# Supplementary material for: Antagonistic maternal and direct effects of the leptin receptor gene on body weight in pigs
Source: PubMed Central journal article supplement (PMC7842917; doi:10.1371/journal.pone.0246198), 2021-01-28
Supplement: pone.0246198.s001.pdf [file pone.0246198.s001.pdf]

**S1 Table. Difference between *LEPR* (rs709596309 C>T) genotypes and additive and dominant effects for investigated traits.** Mean of the estimated marginal posterior distribution of the difference between *LEPR*-TT and *LEPR*-CC genotypes with respect to the *LEPR*-CT genotype (TT-CT and CC-TT, respectively) and additive (a) and dominant (d) values for the *LEPR*-T allele (in parentheses, the probability of each value being greater than zero) for direct and maternal effects.

| Trait                          | Genotype difference   |                      | Genetic effects       |                      |
|--------------------------------|-----------------------|----------------------|-----------------------|----------------------|
|                                | TT – CT               | CC – CT              | a                     | d                    |
| <b>Direct effects</b>          |                       |                      |                       |                      |
| Carcass weight, kg             | 3.0 ( <b>1.00</b> )   | 0.2 (0.57)           | 1.9 ( <b>1.00</b> )   | -1.9 ( <b>0.01</b> ) |
| Backfat thickness, mm          | 6.0 ( <b>1.00</b> )   | -1.8 ( <b>0.04</b> ) | 4.6 ( <b>1.00</b> )   | -4.1 ( <b>0.00</b> ) |
| Loin thickness, mm             | -3.6 ( <b>0.00</b> )  | 1.2 (0.87)           | -2.8 ( <b>0.00</b> )  | 2.4 ( <b>1.00</b> )  |
| Weight at weaning, g           | -180 ( <b>0.00</b> )  | 20 (0.59)            | -110 ( <b>0.00</b> )  | 100 ( <b>0.96</b> )  |
| No. of piglets born alive      | -0.2 (0.23)           | -0.1 (0.40)          | -0.1 (0.31)           | 0.1 (0.73)           |
| No. of piglets at weaning      | -0.1 (0.26)           | 0.1 (0.66)           | -0.1 (0.18)           | 0.02 (0.60)          |
| Age at first parity, days      | 5.8 ( <b>0.99</b> )   | 1.6 (0.71)           | 2.5 ( <b>0.94</b> )   | -4.1 ( <b>0.02</b> ) |
| Milk fat, %                    | -0.2 (0.33)           | 0.2 (0.62)           | -0.2 (0.28)           | 0.1 (0.56)           |
| Plasma triglycerides, µg/ml    | 53.3 ( <b>0.95</b> )  | -0.9 (0.49)          | 3.0 ( <b>0.94</b> )   | -3.2 (0.14)          |
| Plasma free fatty acids, µg/ml | -53.6 ( <b>0.00</b> ) | -12.8 (0.11)         | -13.0 ( <b>0.02</b> ) | 21.2 ( <b>0.98</b> ) |
| <b>Maternal effects</b>        |                       |                      |                       |                      |
| Carcass weight, kg             | -2.3 ( <b>0.04</b> )  | 1.6 (0.85)           | -2.0 ( <b>0.01</b> )  | 0.8 (0.78)           |
| Backfat thickness, mm          | -0.8 (0.18)           | -0.9 (0.20)          | -0.1 (0.44)           | 0.5 (0.74)           |
| Loin thickness, mm             | 1.0 (0.88)            | 0.6 (0.70)           | 0.4 (0.72)            | -0.6 (0.21)          |
