# Supplementary material for: Antagonistic maternal and direct effects of the leptin receptor gene on body weight in pigs
Source: PubMed Central journal article supplement (PMC7842917; doi:10.1371/journal.pone.0246198), 2021-01-28
Supplement: pone.0246198.s002.pdf [file pone.0246198.s002.pdf]

**S2 Table. Effects of *LEPR* (rs709596309) genotype on sow milk fatty acid composition.** Mean of the estimated marginal posterior distribution of the difference between sow *LEPR* genotypes (TT,  $n=28$ , and C-,  $n=84$ ) and probability of this difference being greater than zero ( $P>0$ ) for fatty acid composition (% of total fatty acids) of sow milk. *LEPR* genotypes were considered to differ if this probability value was  $<0.05$  (C- is higher than TT) or  $>0.95$  (TT is higher than C-).

| <b>Fatty acid, %</b>               | <b>Mean</b> | <b>SD</b> | <b>Difference<br/>TT - C-</b> | <b>P&gt;0</b> |
|------------------------------------|-------------|-----------|-------------------------------|---------------|
| Capric acid (C10:0)                | 0.2         | 0.1       | -0.03                         | 0.12          |
| Lauric acid (C12:0)                | 0.4         | 0.3       | -0.03                         | 0.27          |
| Myristic acid (C14:0)              | 3.5         | 0.9       | 0.13                          | 0.78          |
| Myristoleic acid (C14:1n5)         | 0.2         | 0.1       | -0.02                         | 0.21          |
| Palmitic acid (C16:0)              | 28.1        | 3.5       | 0.87                          | 0.92          |
| Palmitoleic acid (C16:1n7)         | 8.7         | 2.7       | 0.36                          | 0.76          |
| Stearic acid (C18:0)               | 4.2         | 0.8       | -0.18                         | 0.13          |
| Vaccenic acid (C18:1n7)            | 2.5         | 0.5       | -0.17                         | 0.01          |
| Oleic acid (C18:1n9)               | 33.9        | 5.6       | -0.52                         | 0.32          |
| Linoleic acid (C18:2n6)            | 14.7        | 3.7       | -0.48                         | 0.23          |
| $\alpha$ -linolenic acid (C18:3n3) | 1.1         | 0.3       | 0.01                          | 0.54          |
| Eicosanoid acid (C20:1n9)          | 0.4         | 0.2       | $<0.01$                       | 0.49          |
| Eicosadienoic acid (C20:2n6)       | 1.0         | 0.5       | -0.06                         | 0.20          |
| Saturated fatty acids              | 36.6        | 4.0       | 0.75                          | 0.85          |
| Monounsaturated fatty acids        | 46.1        | 4.7       | -0.32                         | 0.36          |
| Polyunsaturated fatty acids        | 17.3        | 3.4       | -0.45                         | 0.25          |
