# Supplementary material for: Antagonistic maternal and direct effects of the leptin receptor gene on body weight in pigs
Source: PubMed Central journal article supplement (PMC7842917; doi:10.1371/journal.pone.0246198), 2021-01-28
Supplement: pone.0246198.s003.pdf [file pone.0246198.s003.pdf]

**S3 Table. Frequency of *LEPR* (rs709596309; C>T) genotypes and gene frequency of the allele T (q) in different pig breeds and crosses.**

| Genetic type           | No. of pigs | <i>LEPR</i> genotype |     |     | q    |
|------------------------|-------------|----------------------|-----|-----|------|
|                        |             | CC                   | CT  | TT  |      |
| Iberian                | 92          | 0                    | 0   | 92  | 1.00 |
| Duroc (line 1)         | 1135        | 345                  | 539 | 251 | 0.46 |
| Duroc (line 2)         | 25          | 13                   | 10  | 2   | 0.28 |
| Landrace               | 33          | 32                   | 0   | 1   | 0.03 |
| Pietrain               | 29          | 17                   | 11  | 1   | 0.22 |
| Landrace x Large White | 142         | 122                  | 20  | 0   | 0.07 |
| Landrace x Duroc       | 12          | 9                    | 3   | 0   | 0.12 |
| Wild boar              | 7           | 7                    | 0   | 0   | 0.00 |
