# Supplementary material for: Antagonistic maternal and direct effects of the leptin receptor gene on body weight in pigs
Source: PubMed Central journal article supplement (PMC7842917; doi:10.1371/journal.pone.0246198), 2021-01-28
Supplement: pone.0246198.s004.pdf [file pone.0246198.s004.pdf]

**S4 Table. Summary of experimental data.**

| <b>Experiment</b> | <b>Trait</b>                              | <b>No. of batches</b> | <b>No. of records by <i>LEPR</i> genotype</b> |           | <b>Mean</b> | <b>SD</b> |
|-------------------|-------------------------------------------|-----------------------|-----------------------------------------------|-----------|-------------|-----------|
|                   |                                           |                       | <b>TT</b>                                     | <b>C-</b> |             |           |
| <b>1</b>          | Carcass weight, kg                        | 12                    | 161                                           | 252       | 99.4        | 9.9       |
|                   | Backfat thickness, mm                     | 12                    | 161                                           | 252       | 35.4        | 7.9       |
|                   | Loin thickness, mm                        | 12                    | 161                                           | 252       | 41.1        | 7.1       |
| <b>2</b>          | No. of sows                               | 10                    | 133                                           | 337       | -           | -         |
|                   | No. of parities                           | 10                    | 248                                           | 679       | -           | -         |
|                   | Weight at weaning, kg                     | 10                    | 248                                           | 679       | 5.2         | 0.9       |
|                   | No. of piglets born alive                 | 10                    | 248                                           | 679       | 11.0        | 2.4       |
|                   | No. of piglets at weaning                 | 10                    | 248                                           | 679       | 9.7         | 1.3       |
|                   | Age at first parity, days                 | 8                     | 110                                           | 283       | 378.8       | 22.1      |
|                   | Milk fat, %                               | 3                     | 28                                            | 84        | 7.0         | 2.8       |
| <b>3</b>          | Total feed intake, kg                     | 1                     | 10                                            | 10        | 345.5       | 35.8      |
| <b>4</b>          | Plasma triglycerides, $\mu\text{g/ml}$    | 2                     | 38                                            | 69        | 367.0       | 139.5     |
| <b>5</b>          | Plasma free fatty acids, $\mu\text{g/ml}$ | 2                     | 24                                            | 126       | 174.9       | 58.2      |
